# Supplementary material for: Efficacy of interventions for amblyopia: a systematic review and network meta-analysis
Source: Springer Nature journal article supplement (doi:10.1186/s12886-020-01442-9), 2020-05-25
Supplement: MOESM1 [file 18011150]

### Additional file 1:Search strategy

| Medline(ovid)                     | EMBASE(ovid)                        | Cochrane Central Register of Controlled Trials                     |
|-----------------------------------|-------------------------------------|--------------------------------------------------------------------|
| 1 randomized controlled trial.pt. | 1 exp controlled clinical trial/    | 1 MeSH descriptor: [Randomized Controlled Trial] explode all trees |
| 2 controlled clinical trial.pt.   | 2 exp randomization/                | 2 MeSH descriptor: [Controlled Clinical Trial] explode all trees   |
| 3 random*.af.                     | 3 randomized controlled trial/      | 3 random*.af.                                                      |
| 4 placebo.af.                     | 4 double blind procedure/           | 4 trial:ti,ab,kw                                                   |
| 5 1or2or3or4                      | 5 single blind procedure/           | 5 1or2 or3 or 4                                                    |
| 6 exp amblyopia/                  | 6 random*.af.                       | 6 exp amblyopia/                                                   |
| 7 amblyop*.af.                    | 7 placebo*.af.                      | 7 amblyop*.af.                                                     |
| 8 6or7                            | 8 or/1-7                            | 8 6 or 7                                                           |
| 9 5and8                           | 9 (animal or animal experiment).sh. | 9 5 and 8                                                          |
| 10 exp animals/                   | 10 human.sh.                        |                                                                    |
| 11 exp humans/                    | 11 9 and 10                         |                                                                    |
| 12 10 and 11                      | 12 8 and10                          |                                                                    |
| 13 9and11                         | 13 8 and11                          |                                                                    |
| 14 9and12                         | 14 exp amblyopia/                   |                                                                    |
| 15 13or14                         | 15 amblyop*.af.                     |                                                                    |
|                                   | 16 anopsi*.af.                      |                                                                    |
|                                   | 17 14or15or16                       |                                                                    |
|                                   | 18 12or13                           |                                                                    |
|                                   | 19 17and18                          |                                                                    |
