# Supplementary material for: Efficacy of interventions for amblyopia: a systematic review and network meta-analysis
Source: Springer Nature journal article supplement (doi:10.1186/s12886-020-01442-9), 2020-05-25
Supplement: MOESM3 [file 18011150]

### Additional file 3: Software code used

---

```
library(gemtc);library(coda);library(lattice);
network<-read.mtc.network("C:/ ");
plot(network)
summary(network)
mtc.anohe(network)
R mtc.nodesplit(network)
software model<-mtc.model(network, linearMode="random", type = "consistency", n.chain = 3);
results <-mtc.run(model, sampler ="JAGS", n.adapt = 10000, n.iter = 40000, thin = 1)
gelman.plot(results) #convergence
gelman.diag(results)
plot(results)
forest(relative.effect(results,"/"))
rank.probability(results)
```

---

```
Stata network setup mean sd n, study(studyid) trt(t)
network convert pairs
software networkplot t1 t2
sucra nomv stats("C:/ effectiveness.txt") rprob(effectiveness),rankog
```

---
