# Supplementary material for: Efficacy of interventions for amblyopia: a systematic review and network meta-analysis
Source: Springer Nature journal article supplement (doi:10.1186/s12886-020-01442-9), 2020-05-25
Supplement: MOESM4 [file 18011150]

**Additional file 4: Baseline characteristics of included trials**

| Authors        | Age, y                | Type of Amblyopia |      |      | Grade of Severity <sup>a</sup> | Treatment <sup>b</sup> | Number of Patients | Baseline BCVA in the Amblyopic eye, LogMAR(SD) | Follow-up, w |
|----------------|-----------------------|-------------------|------|------|--------------------------------|------------------------|--------------------|------------------------------------------------|--------------|
|                |                       | Stra              | Anis | Mixd |                                |                        |                    |                                                |              |
| Glaser 2002    | 3-7                   |                   | ✓    | ✓    | Moderate                       | Patch 6H               | 208                | 0.52(0.13)                                     | 24           |
|                |                       |                   |      |      |                                | Atr daiy               | 194                | 0.53(0.14)                                     |              |
| Beck 2003      | 3-7                   | ✓                 | ✓    | ✓    | Severe                         | Patch 6H + N           | 73                 | 0.89(0.18)                                     | 16           |
|                |                       |                   |      |      |                                | Patch 12H + N          | 84                 | 0.90(0.18)                                     |              |
| Repka 2003     | 3-7                   | ✓                 | ✓    | ✓    | Moderate                       | Patch 2H + N           | 92                 | 0.48(0.10)                                     | 16           |
|                |                       |                   |      |      |                                | Patch 6H + N           | 89                 | 0.48(0.11)                                     |              |
| Pediatric 2004 | 3-7                   | ✓                 | ✓    | ✓    | Moderate                       | Atr daiy               | 77                 | 0.46(0.10)                                     | 16           |
|                |                       |                   |      |      |                                | Atr weekly             | 83                 | 0.46(0.11)                                     |              |
| Pediatric 2005 | 3-7                   | ✓                 | ✓    | ✓    | Both                           | Patch 2H + N           | 32                 | 0.67(0.31)                                     | 4            |
|                |                       |                   |      |      |                                | Patch 2H               | 32                 | 0.66(0.26)                                     |              |
| Pediatric 2006 | 3-7                   | ✓                 | ✓    | ✓    | Both                           | Patch 2H + N           | 85                 | 0.56(0.20)                                     | 5            |
|                |                       |                   |      |      |                                | Spectacles             | 88                 | 0.55(0.25)                                     |              |
| Stewart 2007   | 5.6(1.5) <sup>c</sup> | ✓                 | ✓    | ✓    | Both                           | Patch 6H               | 40                 | 0.45 (0.30)                                    | 18           |
|                |                       |                   |      |      |                                | Patch 12H              | 40                 | 0.44 (0.30)                                    |              |
| Tejedor 2007   | 2-10                  | ✓                 | ✓    | ✓    | Moderate to mild               | Atr weekly             | 31                 | 0.43 (0.12)                                    | 6            |
|                |                       |                   |      |      |                                | Optical penalization   | 32                 | 0.44 (0.11)                                    |              |
| Pediatric 2008 | 3-7                   | ✓                 | ✓    | ✓    | Both                           | Patch 2H + D           | 201                | 0.58 (0.22)                                    | 17           |
|                |                       |                   |      |      |                                | Patch 2H + N           | 191                | 0.56 (0.23)                                    |              |
| Cotter 2009    | 3-7                   | ✓                 | ✓    | ✓    | Moderate                       | Atr weekly             | 84                 | 0.47 (0.12)                                    | 18           |
|                |                       |                   |      |      |                                | Art weekly + Plano     | 88                 | 0.50 (0.13)                                    |              |
| Repka 2009     | 3-6                   | ✓                 | ✓    | ✓    | Severe                         | Atr weekly             | 24                 | 0.99 (0.16)                                    | 18           |
|                |                       |                   |      |      |                                | Atr weekly + Plano     | 31                 | 1.01 (0.20)                                    |              |
| Repka 2009     | 7-13                  | ✓                 | ✓    | ✓    | Severe                         | Atr weekly             | 20                 | 0.95 (0.15)                                    | 17           |
|                |                       |                   |      |      |                                | Patch 2H               | 13                 | 0.95 (0.10)                                    |              |
| Pediatric 2013 | 3-8                   |                   |      |      | Residual                       | Patch 2H               | 82                 | 0.43 (0.15)                                    | 10           |
|                |                       |                   |      |      |                                | Patch 6H               | 82                 | 0.45 (0.16)                                    |              |
| Holmes 2016    | 5-12                  | ✓                 | ✓    | ✓    | Severe to moderate             | Binocular therapy      | 177                | 0.51 (0.17)                                    | 16           |
|                |                       |                   |      |      |                                | Patch 2H               | 186                | 0.48 (0.17)                                    |              |
| Kelly 2016     | 4-10                  | ✓                 | ✓    | ✓    | Moderate                       | Binocular therapy      | 13                 | 0.48(0.14)                                     | 2            |
|                |                       |                   |      |      |                                | Patch 2H               | 14                 |                                                |              |
| Pediatric 2015 | 3-8                   |                   |      |      | Residual                       | Atr weekly             | 40                 | 0.48(0.19)                                     | 10           |
|                |                       |                   |      |      |                                | Art weekly + Plano     | 33                 | 0.48(0.16)                                     |              |
| Awan 2005      | < 8                   | ✓                 |      | ✓    | Severe to moderate             | Spectacles             | 18                 | 0.59 (0.23)                                    | 12           |
|                |                       |                   |      |      |                                | Patch 3H               | 17                 | 0.63 (0.17)                                    |              |
|                |                       |                   |      |      |                                | Patch 6H               | 17                 | 0.69 (0.22)                                    |              |

(continued)

| Authors       | Age, y | Type of Amblyopia |      |      | Grade of Severity  | Treatment            | Number of Patients | Mean(SD) BCVA in the Amblyopic eye, LogMAR | Follow-up, mo |
|---------------|--------|-------------------|------|------|--------------------|----------------------|--------------------|--------------------------------------------|---------------|
|               |        | Stra              | Anis | Mixd |                    |                      |                    |                                            |               |
| Gao 2018      | ≥7     | ✓                 | ✓    | ✓    | Severe to moderate | Spectacles           | 50                 | 0.51(0.18)                                 | 6             |
|               |        |                   |      |      |                    | Binocular therapy    | 57                 | 0.53(0.16)                                 |               |
| Scheiman 2009 | 7-12   | ✓                 | ✓    | ✓    | Moderate           | Atr weekly + N       | 88                 | 61.7 (6.6)letters <sup>d</sup>             | 17            |
|               |        |                   |      |      |                    | Patch 2h + N         | 84                 | 62.4 (5.7)letters                          |               |
| Manh 2018     | 13-16  | ✓                 | ✓    | ✓    | Severe to moderate | Patch 2h             | 56                 | 56.1 (9.7)                                 | 16            |
|               |        |                   |      |      |                    | Binocular therapy    | 39                 | 58.8 (9.1)                                 |               |
|               |        |                   |      |      |                    | Acupuncture          | 41                 | 0.46 (0.16)                                |               |
| Menon 2008    | 8-20   |                   | ✓    |      | Severe to moderate | Patch 12H            | 29                 | 0.68(0.12)                                 | 24            |
|               |        |                   |      |      |                    | Atr daiy             | 28                 | 0.67(0.17)                                 |               |
| Holmes 2019   | 7-12   | ✓                 | ✓    | ✓    | Severe to moderate | Spectacles           | 67                 | 60.0 (7.8)letters                          | 8             |
|               |        |                   |      |      |                    | Binocular therapy    | 67                 | 59.1 (8.2)letters                          |               |
| Rajavi 2016   | 3-10   | ✓                 | ✓    | ✓    | All                | Patching             | 25                 | 0.33 (0.17)                                | 4             |
|               |        |                   |      |      |                    | Binocular + patching | 25                 | 0.34 (0.14)                                |               |
| Herbison 2016 | 4-8    | ✓                 | ✓    | ✓    | All                | Spectacles           | 24                 | 0.50 (0.20)                                | 10            |
|               |        |                   |      |      |                    | Binocular therapy    | 26                 | 0.49 (0.17)                                |               |

Abbreviations: y years, SD standard difference, w week, Stra strabismus, Anis anisometropia, H hours per day, Atr atropine, Plano plano lens over the sound eye

<sup>a</sup>Grade according to visual acuity with mild amblyopia: > 20/40; moderate amblyopia: 20/40-20/100; severe amblyopia: 20/125-20/400

<sup>b</sup>All the treatments are based on spectacle correction

<sup>c</sup>Data are reported as average age with standard error

<sup>d</sup>Data are given as letter score, with a score of 85 letters approximating 20/20 visual acuity and 5 letters approximating 1 log MAR line of acuity
