# Supplementary material for: Efficacy of interventions for amblyopia: a systematic review and network meta-analysis
Source: BMC Ophthalmol. 2020 May 25;20:203. doi: 10.1186/s12886-020-01442-9 (PMC7249307; doi:10.1186/s12886-020-01442-9)
Supplement: Supplementary file 2 — Additional file 2. Therapeutic regimens. [file 12886_2020_1442_MOESM2_ESM.pdf]

## Additional file 2: therapeutic regimens

|                      |                                                                                                |
|----------------------|------------------------------------------------------------------------------------------------|
| Spectacles           | Participants were just provided with spectacles and/or contact lenses if needed                |
| Patch 2H             | 2 hours patching of the sound eye per day                                                      |
| Patch 6H             | 6 hours patching of the sound eye per day                                                      |
| Patch 12H            | 12 hours patching per day or full-time patching of the sound eye                               |
| Patch 2H + N         | In addition to the patching, the child spend at least 1 hour doing near visual activities.     |
| Patch 2H + D         | In addition to the patching, the child spend at least 1 hour doing distance visual activities. |
| Atr daily            | atropine 1% eye drops (per day)                                                                |
| Atr weekly           | atropine 1% eye drops (Saturday and Sunday)                                                    |
| Atr weekly + Plano   | atropine 1% eye drops (Saturday and Sunday) while wearing a plano lens over the sound eye      |
| Optical penalization | positive defocus of the sound eye                                                              |
| Binocular therapy    | 1 hour per day of the binocular games on electronic devices                                    |

Abbreviations: *H* hours per day, *Atr* atropine, *N* near activities, *D* distant activities, *Plano* plano lens over the sound eye
