# Supplementary material for: Efficacy of interventions for amblyopia: a systematic review and network meta-analysis
Source: BMC Ophthalmol. 2020 May 25;20:203. doi: 10.1186/s12886-020-01442-9 (PMC7249307; doi:10.1186/s12886-020-01442-9)

## Additional file 5: Quality assessment of included studies

|                |   |   |   |   |   |   |
|----------------|---|---|---|---|---|---|
| Gao 2018       | + | ? | + | + | + | ? |
| Herbison 2018  | + | + | + | + | + | ? |
| Holmes 2016    | + | ? | + | + | + | ? |
| Iwata 2018     | + | ? | + | + | + | ? |
| Kelly 2016     | + | + | + | + | + | ? |
| Manh 2018      | + | ? | + | + | + | ? |
| Menon 2008     | + | ? | + | + | + | ? |
| PEDIG 2002     | + | ? | + | + | + | ? |
| PEDIG 2003     | + | ? | + | + | + | ? |
| PEDIG 2003(2)  | + | ? | + | + | + | ? |
| PEDIG 2004     | + | ? | + | + | + | ? |
| PEDIG 2005     | ? | ? | + | + | + | ? |
| PEDIG 2006     | + | ? | + | + | + | ? |
| PEDIG 2008     | + | ? | + | + | + | ? |
| PEDIG 2009     | + | ? | + | + | + | ? |
| PEDIG 2009(2)  | + | ? | + | + | + | ? |
| PEDIG 2013     | + | ? | + | + | + | ? |
| PEDIG 2015     | + | ? | + | + | + | ? |
| PEDIG 2018     | + | ? | + | + | + | ? |
| Proudlock 2005 | + | + | + | + | + | ? |
| Rajw 2016      | + | + | + | + | + | ? |
| Repka 2009     | ? | ? | + | + | + | ? |
| Stewart 2007   | ? | ? | + | + | + | ? |
| Telefor 2007   | + | ? | + | + | + | ? |

Random sequence generation (selection bias)  
Allocation concealment (selection bias)  
Blinding of participants and personnel (performance bias)  
Blinding of outcome assessment (detection bias)  
Incomplete outcome data (attrition bias)  
Selective reporting (reporting bias)  
Other bias

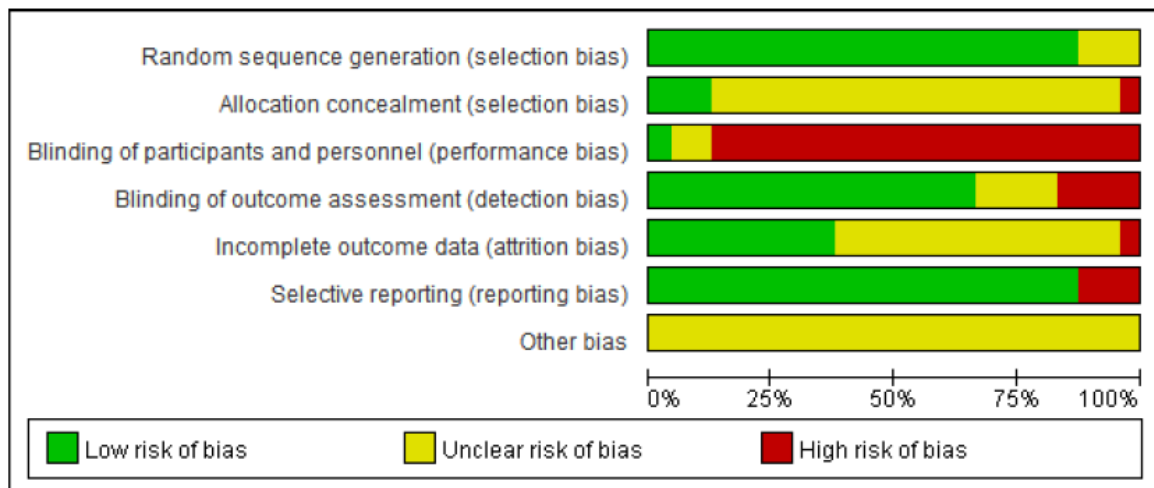

Supplement: Supplementary file 5 — Additional file 5. Risk of bias assessment. [file 12886_2020_1442_MOESM5_ESM.pdf]
