# Supplementary material for: Efficacy of interventions for amblyopia: a systematic review and network meta-analysis
Source: BMC Ophthalmol. 2020 May 25;20:203. doi: 10.1186/s12886-020-01442-9 (PMC7249307; doi:10.1186/s12886-020-01442-9)
Supplement: Supplementary file 6 — Additional file 6. Rank probability and SUCRAs. [file 12886_2020_1442_MOESM6_ESM.pdf]

### Additional file 6: Rank probability and SUCRAs

|                      | 1    | 2    | 3    | 4    | 5    | 6    | 7    | 8    | 9    | 10   | 11   |
|----------------------|------|------|------|------|------|------|------|------|------|------|------|
| Spectacles           | 0.00 | 0.00 | 0.00 | 0.01 | 0.01 | 0.02 | 0.05 | 0.09 | 0.20 | 0.61 | 0.00 |
| Patch 2H             | 0.00 | 0.01 | 0.05 | 0.12 | 0.21 | 0.24 | 0.20 | 0.13 | 0.02 | 0.01 | 0.00 |
| Patch 6H             | 0.14 | 0.23 | 0.26 | 0.21 | 0.09 | 0.04 | 0.02 | 0.01 | 0.00 | 0.00 | 0.00 |
| Patch 12H            | 0.05 | 0.09 | 0.12 | 0.15 | 0.15 | 0.12 | 0.11 | 0.09 | 0.07 | 0.05 | 0.00 |
| Patch 2H + N         | 0.30 | 0.27 | 0.15 | 0.10 | 0.07 | 0.05 | 0.04 | 0.02 | 0.01 | 0.00 | 0.00 |
| Patch 2H + D         | 0.16 | 0.18 | 0.13 | 0.10 | 0.08 | 0.07 | 0.07 | 0.08 | 0.06 | 0.07 | 0.00 |
| Atr daily            | 0.01 | 0.02 | 0.05 | 0.09 | 0.13 | 0.16 | 0.17 | 0.17 | 0.12 | 0.10 | 0.00 |
| Atr weekly           | 0.00 | 0.03 | 0.05 | 0.09 | 0.13 | 0.16 | 0.17 | 0.16 | 0.11 | 0.09 | 0.00 |
| Atr weekly + Plano   | 0.34 | 0.16 | 0.17 | 0.11 | 0.08 | 0.05 | 0.04 | 0.03 | 0.02 | 0.01 | 0.00 |
| Optical penalization | 0.00 | 0.00 | 0.00 | 0.00 | 0.00 | 0.00 | 0.00 | 0.00 | 0.00 | 0.00 | 1.00 |
| Binocular therapy    | 0.00 | 0.00 | 0.01 | 0.03 | 0.05 | 0.09 | 0.14 | 0.22 | 0.40 | 0.06 | 0.00 |

Abbreviations: *H* hours per day, *Atr* atropine, *N* near activities, *D* distant activities, *Plano* plano lens over the sound eye

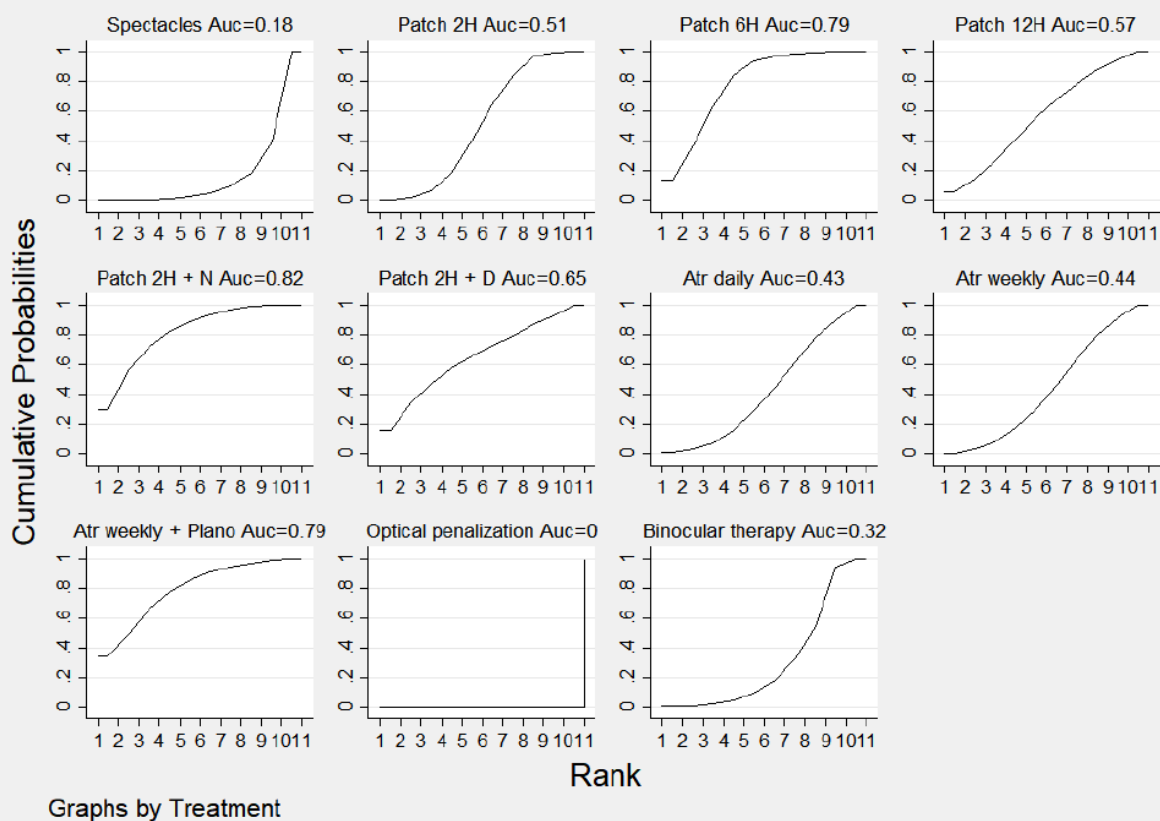

Abbreviations: *H* hours per day, *Atr* atropine, *N* near activities, *D* distant activities, *Plano* plano lens over the sound eye
