# Supplementary material for: Efficacy of interventions for amblyopia: a systematic review and network meta-analysis
Source: BMC Ophthalmol. 2020 May 25;20:203. doi: 10.1186/s12886-020-01442-9 (PMC7249307; doi:10.1186/s12886-020-01442-9)
Supplement: Supplementary file 7 — Additional file 7. Inconsistency analysis. [file 12886_2020_1442_MOESM7_ESM.pdf]

### Additional file 7: Inconsistency test

| Comparisons                | Direct              | Indirect            | Network             | P value |
|----------------------------|---------------------|---------------------|---------------------|---------|
| Patch 2H vs Spectacles     | 0.51 (-0.70, 1.70)  | 0.38 (-0.20, 0.94)  | 0.42 (-0.052, 0.90) | 0.84    |
| Patch 6H vs Spectacles     | 1.00 (-0.38, 2.40)  | 0.67 (-0.13, 1.40)  | 0.73 (0.11, 1.4)    | 0.67    |
| Patch 2H + N vs Spectacles | 0.60 (-0.21, 1.4)   | 1.50 (0.24, 2.8)    | 0.85 (0.19, 1.6)    | 0.23    |
| Binocular vs Spectacles    | -0.21 (-0.13, 0.61) | -0.09 (-1.1, 0.93)  | 0.17 (-0.13, 0.53)  | 0.56    |
| Patch 6H vs Patch 2H       | 0.38 (-0.14, 0.91)  | -0.13 (-1.4, 1.1)   | 0.32 (-0.13, 0.77)  | 0.43    |
| Patch+N vs Patch 2H        | 1.00 (-0.16, 2.20)  | 0.10 (-0.89, 1.00)  | 0.43 (-0.29, 1.20)  | 0.22    |
| Atr weekly vs Patch 2H     | -0.21 (-0.89, 0.48) | 0.30 (-0.82, 1.50)  | -0.06 (-0.65, 0.51) | 0.41    |
| Binocular vs Patch 2H      | -0.28 (-0.75, 0.19) | -0.02 (-0.93, 0.97) | -0.24 (-0.63, 0.19) | 0.56    |
| Patch 12H vs Patch 6H      | -0.16 (-0.85, 0.53) | -0.41 (-1.5, 0.68)  | -0.23 (-0.79, 0.33) | 0.68    |
| Atr daily vs Patch 6H      | -0.32 (-1.10, 0.43) | -0.49 (-1.30, 0.33) | -0.39 (-0.93, 0.13) | 0.74    |
| Atr daily vs Patch 12H     | -0.05 (-0.93, 0.87) | -0.28 (-1.20, 0.63) | -0.16 (-0.79, 0.46) | 0.70    |
| Atr weekly vs Atr daily    | 0.20 (-0.61, 1.00)  | -0.31 (-1.40, 0.73) | 0.02 (-0.61, 0.62)  | 0.41    |

Abbreviations: *H* hours per day, *Atr* atropine, *N* near activities, *D* distant activities, *Plano* plano lens over the sound eye
